# Supplementary material for: Virucidal or Not Virucidal? That Is the Question—Predictability of Ionic Liquid’s Virucidal Potential in Biological Test Systems
Source: PubMed Central journal article supplement (PMC5877651; doi:10.3390/ijms19030790), 2018-03-09
Supplement: ijms-19-00790-s001.pdf [file ijms-19-00790-s001.pdf]

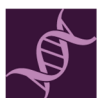

# Supplementary Materials: Virucidal or Not Virucidal? That Is the Question – Predictability of Ionic Liquid’s Virucidal Potential in Biological Test Systems

**Table S1.** Effects of varying the cationic head group on three bacteriophages, related bacterial host strains and enzyme inhibition.

| Effect of cationic head groups              |                                        |                                       |                                         |                                       |                     |                    |                   |
|---------------------------------------------|----------------------------------------|---------------------------------------|-----------------------------------------|---------------------------------------|---------------------|--------------------|-------------------|
| Ionic Liquid                                | Virucidal Concentration mg/L           |                                       |                                         | Minimum Inhibitory Concentration mg/L |                     |                    |                   |
|                                             | P100<br>≥ 4 Log <sub>10</sub><br>Units | MS2<br>≥ 4 Log <sub>10</sub><br>Units | Phi 6<br>≥ 4 Log <sub>10</sub><br>Units | <i>L. monocytogenes</i>               | <i>E. coli</i>      | <i>P. syringae</i> | Enzyme            |
| [DMIM][Oac]                                 | >50000 <sup>a</sup>                    | >50000                                | >50000                                  | >10000                                | >10000              | 10000              | 50000             |
|                                             | (>50000;<br>>50000)                    | (>50000;<br>>50000)                   | (>50000;<br>>50000)                     | (>10000;<br>>10000)                   | (>10000;<br>>10000) | (10000;<br>10000)  | (50000;<br>50000) |
| [TMA][Oac]                                  | >50000 <sup>a</sup>                    | >50000                                | >50000                                  | >10000                                | >10000              | 10000              | 50000             |
|                                             | (>50000;<br>>50000)                    | (>50000;<br>>50000)                   | (>50000;<br>>50000)                     | (>10000;<br>>10000)                   | (>10000;<br>>10000) | (10000;<br>10000)  | (50000;<br>50000) |
| [TBMA][Oac]                                 | >50000 <sup>a</sup>                    | >50000                                | >50000                                  | 10000                                 | 5000                | 5000               | 50000             |
|                                             | (>50000;<br>>50000)                    | (>50000;<br>>50000)                   | (>50000;<br>>50000)                     | (10000;<br>10000)                     | (5000;<br>5000)     | (5000;<br>5000)    | (50000;<br>50000) |
| [TBMP][Oac]                                 | >50000 <sup>a</sup>                    | >50000                                | >50000                                  | 10000                                 | 5000                | 3750               | 50000             |
|                                             | (>50000;<br>>50000)                    | (>50000;<br>>50000)                   | (>50000;<br>>50000)                     | (10000;<br>10000)                     | (5000;<br>5000)     | (2500;<br>5000)    | (50000;<br>50000) |
| [1,1,2,3,4,<br>Pentamethylguanidinium][Oac] | >50000 <sup>a</sup>                    | >50000                                | >50000                                  | 2500                                  | >10000              | 10000              | 50000             |
|                                             | (>50000;<br>>50000)                    | (>50000;<br>>50000)                   | (>50000;<br>>50000)                     | (2500;<br>2500)                       | (>10000;<br>>10000) | (10000;<br>10000)  | (50000;<br>50000) |
| [EMMor][Oac]                                | >50000 <sup>a</sup>                    | >50000                                | >50000                                  | 10000                                 | >10000              | 10000              | 50000             |
|                                             | (>50000;<br>>50000)                    | (>50000;<br>>50000)                   | (>50000;<br>>50000)                     | (10000;<br>>10000)                    | (>10000;<br>>10000) | (10000;<br>10000)  | (50000;<br>50000) |
| [Cholinium][Oac]                            | >50000 <sup>a</sup>                    | >50000                                | >50000                                  | >10000                                | >10000              | 10000              | 40000             |
|                                             | (>50000;<br>>50000)                    | (>50000;<br>>50000)                   | (>50000;<br>>50000)                     | (>10000;<br>>10000)                   | (>10000;<br>>10000) | (10000;<br>10000)  | (50000;<br>10000) |
| [BMPyr][Br]                                 | >50000 <sup>a</sup>                    | >50000                                | >50000                                  | >10000                                | 10000               | 2500               | 50000             |
|                                             | (>50000;<br>>50000)                    | (>50000;<br>>50000)                   | (>50000;<br>>50000)                     | (>10000;<br>>10000)                   | (10000;<br>10000)   | (2500;<br>2500)    | (50000;<br>50000) |

<sup>a</sup> Calculation based on Fister et al. [30]. Mean virucidal concentration (VC) values [mg/L] and the span of measured values (lower limit; upper limit) are shown for the virus data. Mean MIC values [mg/L] and the span of measured values (lower limit; upper limit) are shown for bacterial and enzyme data

**Table S2.** Effects of IL anion chaotropicity tested on three bacteriophages, related bacterial host strains and enzyme inhibition.

| Effect of Anions of the Hofmeister series |                                        |                                       |                                         |                                              |                     |                     |                   |
|-------------------------------------------|----------------------------------------|---------------------------------------|-----------------------------------------|----------------------------------------------|---------------------|---------------------|-------------------|
| Ionic Liquid                              | Virucidal Concentration mg/L           |                                       |                                         | Minimum Inhibitory Concentration mg/L        |                     |                     |                   |
|                                           | P100<br>≥ 4 Log <sub>10</sub><br>Units | MS2<br>≥ 4 Log <sub>10</sub><br>Units | Phi 6<br>≥ 4 Log <sub>10</sub><br>Units | <i>L.</i><br><i>monocytogen</i><br><i>es</i> | <i>E. coli</i>      | <i>P. syringae</i>  | Enzyme            |
| [C <sub>4</sub> mim][MeSO <sub>4</sub> ]  | >50000 <sup>a</sup>                    | >50000 <sup>a</sup>                   | >50000                                  | >10000                                       | >10000              | 7500                | 50000             |
|                                           | (>50000;<br>>50000)                    | (>50000;<br>>50000)                   | (>50000;<br>>50000)                     | (>10000;<br>>10000)                          | (>10000;<br>>10000) | (5000;<br>10000)    | (50000;<br>50000) |
| [C <sub>4</sub> mim][I]                   | >50000 <sup>a</sup>                    | >50000 <sup>a</sup>                   | >50000                                  | 5000                                         | 1875                | 1250                | 50000             |
|                                           | (>50000;<br>>50000)                    | (>50000;<br>>50000)                   | (>50000;<br>>50000)                     | (5000; 5000)                                 | (2500; 5000)        | (1250; 1250)        | (50000;<br>50000) |
| [C <sub>4</sub> mim][DCA]                 | >50000 <sup>a</sup>                    | >50000 <sup>a</sup>                   | >50000                                  | >10000                                       | 10000               | 3750                | 50000             |
|                                           | (>50000;<br>>50000)                    | (>50000;<br>>50000)                   | (>50000;<br>>50000)                     | (>10000;<br>>10000)                          | (10000;<br>>10000)  | (2500; 5000)        | (50000;<br>50000) |
| [C <sub>4</sub> mim][SCN]                 | >50000 <sup>a</sup>                    | >50000 <sup>a</sup>                   | >50000                                  | >10000                                       | 10000               | 3750                | 36667             |
|                                           | (>50000;<br>>50000)                    | (>50000;<br>>50000)                   | (>50000;<br>>50000)                     | (>10000;<br>>10000)                          | (10000;<br>10000)   | (2500; 5000)        | (50000;<br>10000) |
| [C <sub>4</sub> mim][TCM]                 | >50000 <sup>a</sup>                    | >50000 <sup>a</sup>                   | 25000                                   | 10000                                        | 5000                | 2500                | 10000             |
|                                           | (>50000;<br>>50000)                    | (>50000;<br>>50000)                   | (25000;<br>25000)                       | (10000;<br>10000)                            | (5000; 5000)        | (2500; 2500)        | (10000;<br>10000) |
| [C <sub>4</sub> mim][TCA]                 | >50000 <sup>a</sup>                    | >50000 <sup>a</sup>                   | >50000                                  | >10000                                       | >10000              | >10000              | 10000             |
|                                           | (>50000;<br>>50000)                    | (>50000;<br>>50000)                   | (>50000;<br>>50000)                     | (>10000;<br>>10000)                          | (>10000;<br>>10000) | (>10000;<br>>10000) | (10000;<br>10000) |

<sup>a</sup> Calculation based on Fister et al. [30]. Mean virucidal concentration (VC) values [mg/L] and the span of measured values (lower limit; upper limit) are shown for the virus data. Mean MIC values [mg/L] and the span of measured values (lower limit; upper limit) are shown for bacterial and enzyme data

**Table S3.** Abbreviations and names of all tested ILs.

| Ionic Liquids             |                                  |          |
|---------------------------|----------------------------------|----------|
| Abbreviation              | Cation                           | Anion    |
| [C <sub>1</sub> mim][Cl]  | Dimethylimidazolium              | Chloride |
| [C <sub>2</sub> mim][Cl]  | 1-Ethyl-3-methylimidazolium      | Chloride |
| [C <sub>4</sub> mim][Cl]  | 1-Butyl-3-methylimidazolium      | Chloride |
| [C <sub>6</sub> mim][Cl]  | 1-Hexyl-3-methylimidazolium      | Chloride |
| [C <sub>8</sub> mim][Cl]  | 1-Octyl-3-methylimidazolium      | Chloride |
| [C <sub>10</sub> mim][Cl] | 1-Decyl-3-methylimidazolium      | Chloride |
| [C <sub>12</sub> mim][Cl] | 1-Dodecyl-3-methylimidazolium    | Chloride |
| [C <sub>14</sub> mim][Cl] | 1-Methyl-3-tetradecylimidazolium | Chloride |
| [C <sub>16</sub> mim][Cl] | 1-Hexadecyl-3-methylimidazolium  | Chloride |
| [TMC <sub>8</sub> A][Cl]  | Trimethyloctylammonium           | Chloride |

|                                          |                                   |                   |
|------------------------------------------|-----------------------------------|-------------------|
| [DODMA][Cl]                              | Diocetyltrimethylammonium         | Chloride          |
| [C <sub>10</sub> C <sub>10</sub> Im][Cl] | 1,3-Didecyl-2-methylimidazolium   | Chloride          |
| [TOMA][Cl]                               | Triocetyltrimethylammonium        | Chloride          |
| [C <sub>4</sub> mim][MeSO <sub>4</sub> ] | 1-Butyl-3-methylimidazolium       | Methylsulfate     |
| [C <sub>4</sub> mim][I]                  | 1-Butyl-3-methylimidazolium       | Iodate            |
| [C <sub>4</sub> mim][DCA]                | 1-Butyl-3-methylimidazolium       | Dicyanamide       |
| [C <sub>4</sub> mim][SCN]                | 1-Butyl-3-methylimidazolium       | Thiocyanate       |
| [C <sub>4</sub> mim][TCM]                | 1-Butyl-3-methylimidazolium       | Tricyanomethadine |
| [C <sub>4</sub> mim][TCA]                | 1-Butyl-3-methylimidazolium       | Trichloroacetate  |
| [DMIM][Oac]                              | 1-Di-3-Methylimidazolium          | Acetate           |
| [TMA][Oac]                               | Tetramethylammonium               | Acetate           |
| [TBMA][Oac]                              | Tributylmethylammonium            | Acetate           |
| [TBMP][Oac]                              | Tributylmethylphosphonium         | Acetate           |
| [1,1,2,3,4, Pentamethylguanidinium][Oac] | 1,1,2,3,4, Pentamethylguanidinium | Acetate           |
| [EMMor][Oac]                             | Ethyl-Methylmorpholinium          | Acetate           |
| [Cholinium][Oac]                         | Cholinium                         | Acetate           |
| [BMPyr][Br]                              | 1-Butyl-1-Methylpyrrolidinium     | Bromide           |
